# Supplementary material for: 4-Bis(4-aminophenoxy)phenoxy derivitized phthalocyanine conjugated to metallic nanoparticles: searching for enhanced optical limiting materials
Source: Royal Society of Chemistry journal article supplement (doi:10.1039/c7nj02718d), 2017-01-01
Supplement: c7nj02718d1.pdf [file c7nj02718d1.pdf]

## Supplementary information

### 4-Bis (4-aminophenoxy)phenoxy derivitized phthalocyanine conjugated to metallic nanoparticles, searching for enhanced optical limiting materials.

Njemuwa Nwaji, John Mack and Tebello Nyokong\*

Department of Chemistry, Rhodes University, Grahamstown 6140, South Africa

5-level model rate equations S1-S7 follow

$$\frac{dN_0}{dt} = -\frac{\delta_0 I N_0}{\hbar \omega} - \frac{\beta I^2}{2\hbar \omega} + \frac{N_0}{\tau_0} + \frac{N_2}{\tau_1} \quad (\text{S1})$$

$$\frac{dN_1}{dt} = \frac{\delta_1 I N_1}{\hbar \omega} + \frac{\delta_0 I N_0}{\hbar \omega} - \frac{N_0}{\tau_0} - \frac{N_0}{\tau_{isc}} + \frac{N_1}{\tau_1} \quad (\text{S2})$$

$$\frac{dN_2}{dt} = \frac{\delta_1 I N_1}{\hbar \omega} + \frac{\beta I^2}{2\hbar \omega} - \frac{N_1}{\tau_1} \quad (\text{S3})$$

$$\frac{dN_3}{dt} = -\frac{\delta_2 I N_3}{\hbar \omega} - \frac{N_2}{\tau_2} + \frac{N_0}{\tau_{isc}} + \frac{N_3}{\tau_3} \quad (\text{S4})$$

where  $\delta_0$ ,  $\delta_1$  and  $\delta_2$  are the ground, singlet and triplet excited state absorption cross section respectively,  $\hbar$  is Planck's constant,  $\omega$  is the frequency of light, the  $N_i$  values represent the populations in the different states;  $\beta$  is the two photon absorption (TPA) cross-section, the  $\tau_i$  values are the lifetimes of the excited states; and  $\tau_{isc}$  is the lifetime of intersystem crossing.

The intensity transmitted through the sample is represented as  $I$ .

The intensity transmitted through the sample ( $I$ ) is given by equations

$$\frac{dI}{dt} = \frac{c}{n_r} \frac{dI}{dz} = \frac{cI}{n_r} [\delta_0 N_1 + \delta_1 N_2 + \delta_2 N_3] \quad (\text{S5})$$

$$I = I_{00} \left( \frac{\omega_0^2}{\omega^2(z)} \right) \exp \left( -\frac{t^2}{\tau_p^2} \right) \exp \left( -\frac{2r^2}{\omega^2(z)} \right) \quad (S6)$$

$$\omega(z) = \omega_0 \sqrt{1 + \left( \frac{z}{z_0} \right)^2}; \quad z_0 = \frac{\pi \omega_0^2}{\lambda} \quad (7)$$

where  $n_r$  is the refractive index ( $n_r = 1.479$  in DMSO),  $c$  is the speed of light in vacuum,  $I_{00}$  is the peak intensity at the focus of Gaussian beam;  $\tau_p$  is the input pulse width;  $\omega_0$  is beam waist at focus,  $z_0$  is Rayleigh range and  $r$  is the radius of the aperture.  $dI/dz$  in eq.S5 describes the change of photon flux with propagation of laser light through the sample with  $z$  as the position of the sample in the beam profile.

## Supporting Figures

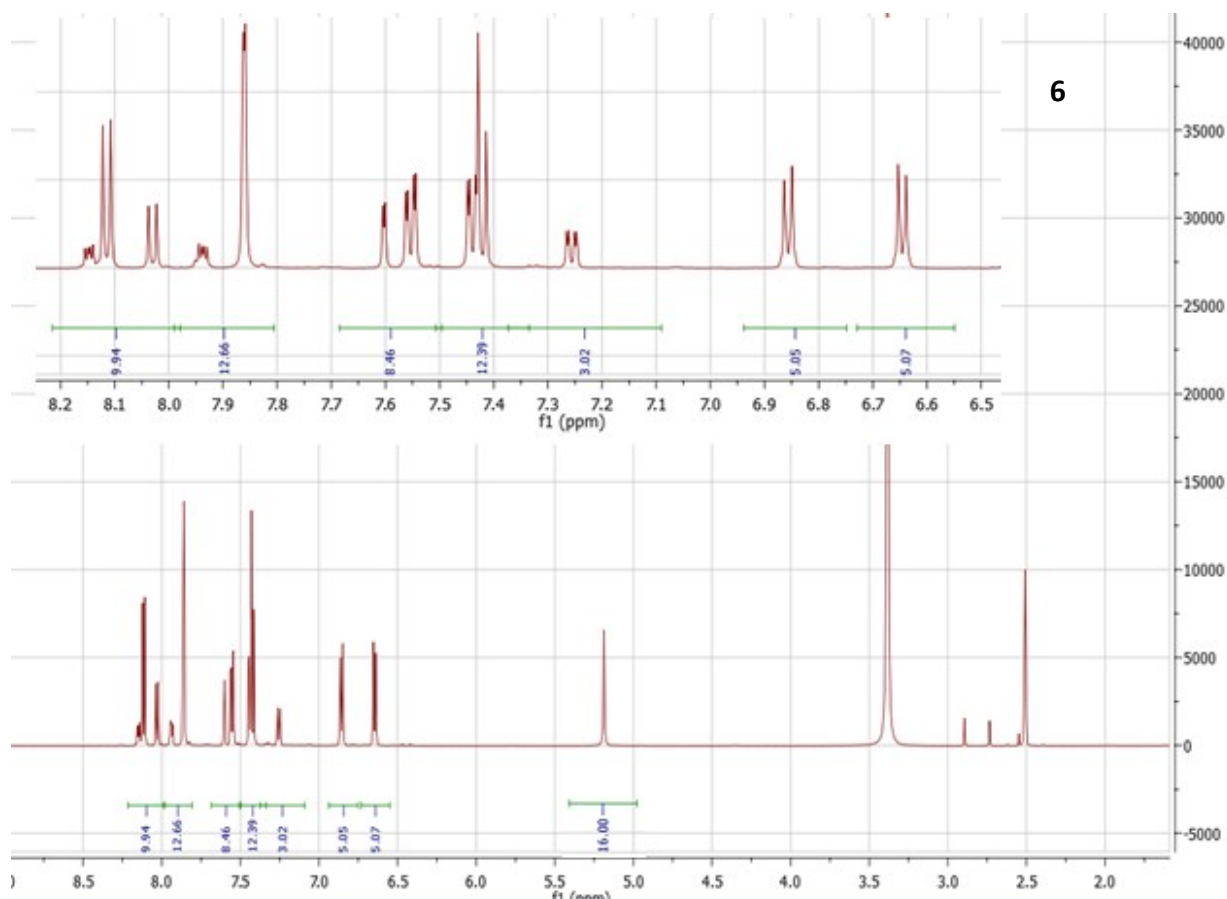

**Fig. S1** NMR spectrum of complex **6** in  $\text{DMSO-d}_6$  (insert, expanded section of the spectra)

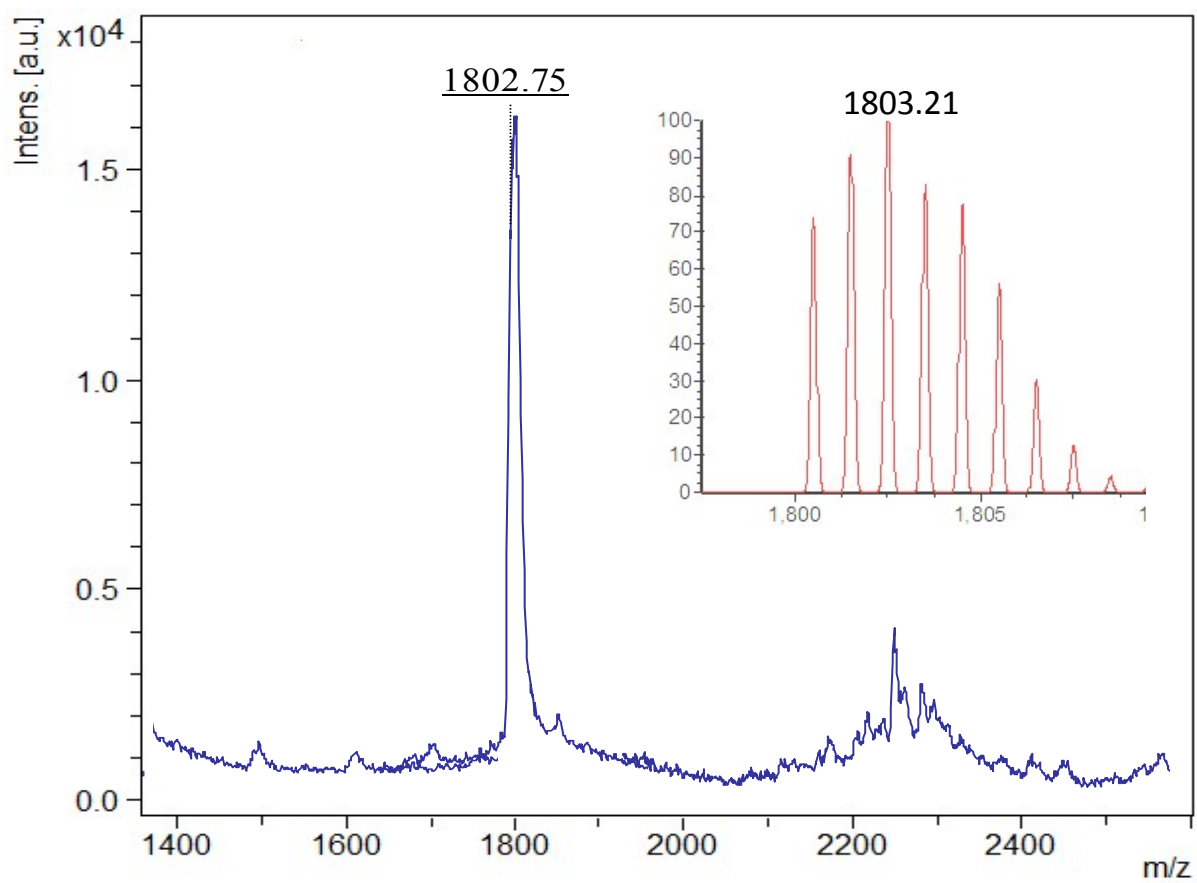

**Fig. S2:** MALDI-TOF mass spectra of complex **6** (insert, simulated isotropic mass distribution)

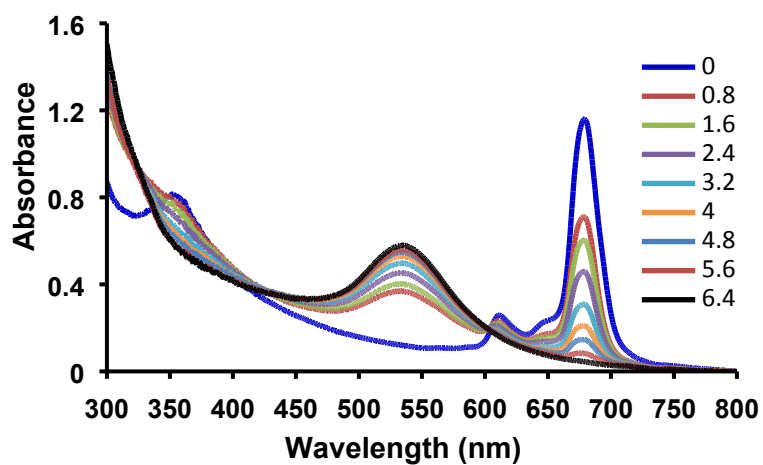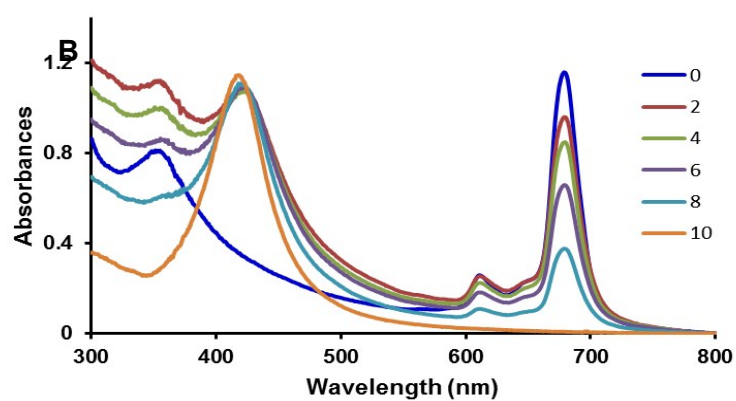

Fig. S3: Absorption spectra of 3 (5.0  $\mu\text{M}$ ) in aqueous solution containing different ratio of AuNPs or AgNPs

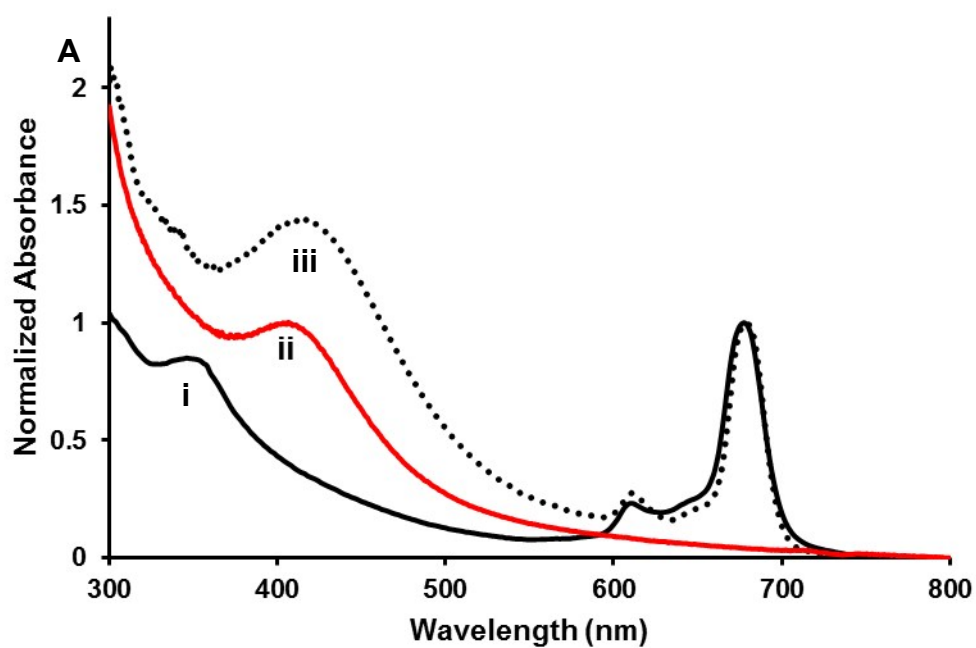

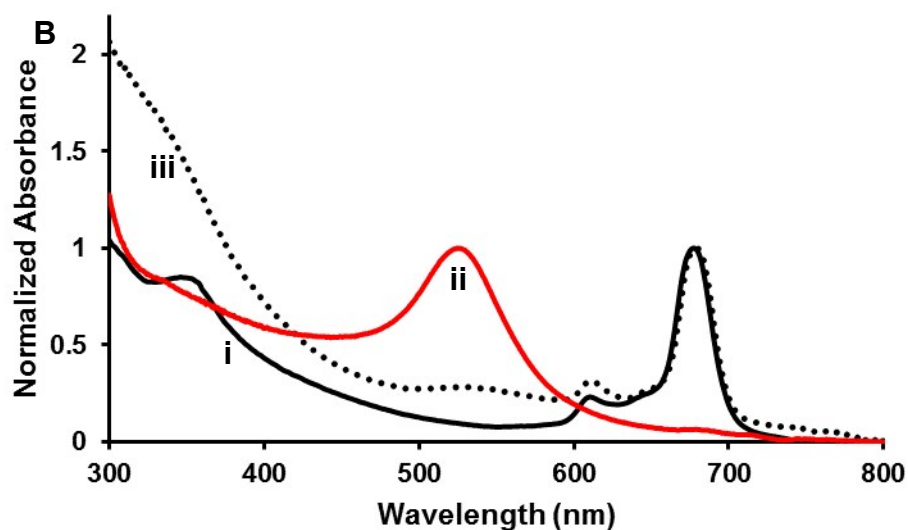

**Fig. S4:** Absorption spectra of (A) **6** (i), OA-AgNPs (ii) and **6SA**-AgNPs (iii), (B), **6** (i) GSH-AuNPs (ii) and **6CB**-AuNPs (iii) in DMSO.

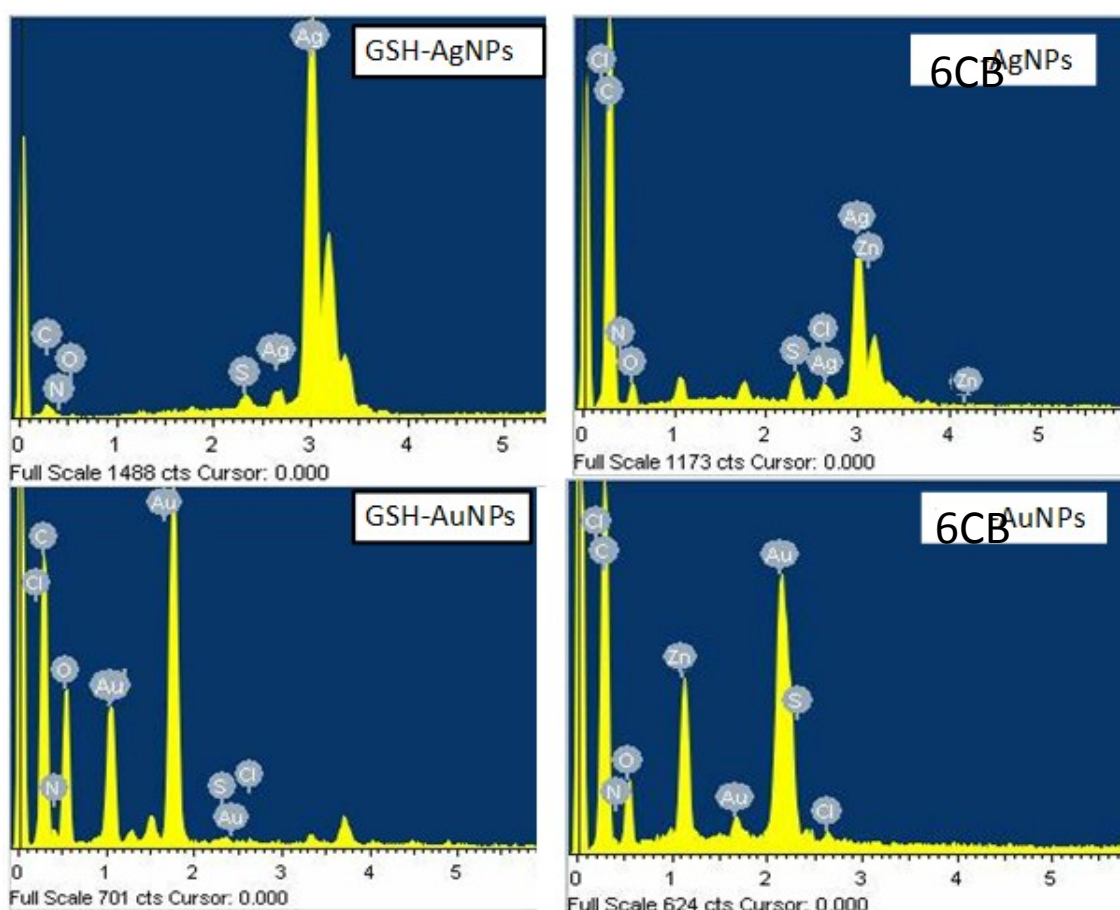

**Fig. S5:** Representative EDX spectra of glutathione functionalized nanoparticles alone and when conjugated to complex **6**

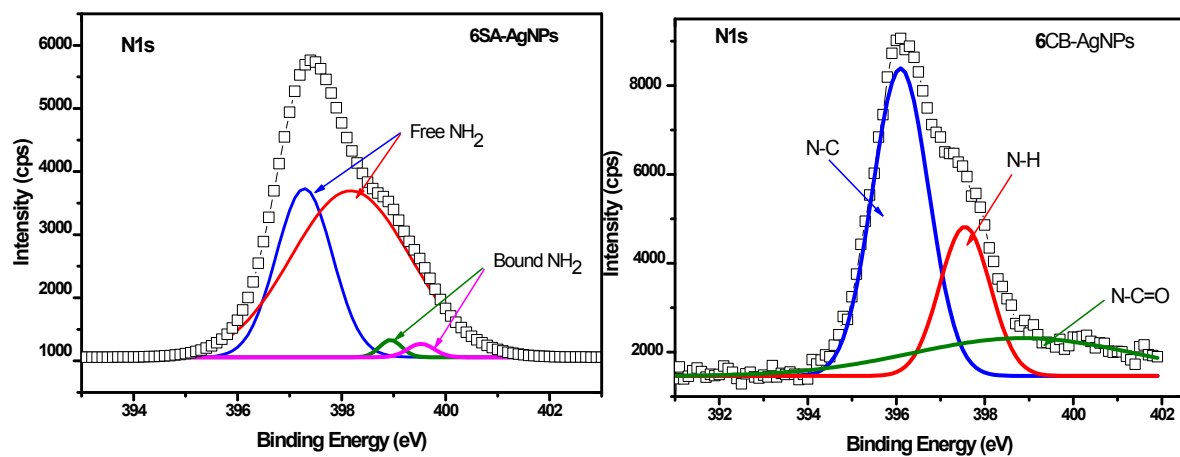

**Fig. S6:** High resolution XPS spectrum of N 1s for 6SA-AgNPs and 6CB-AgNPs

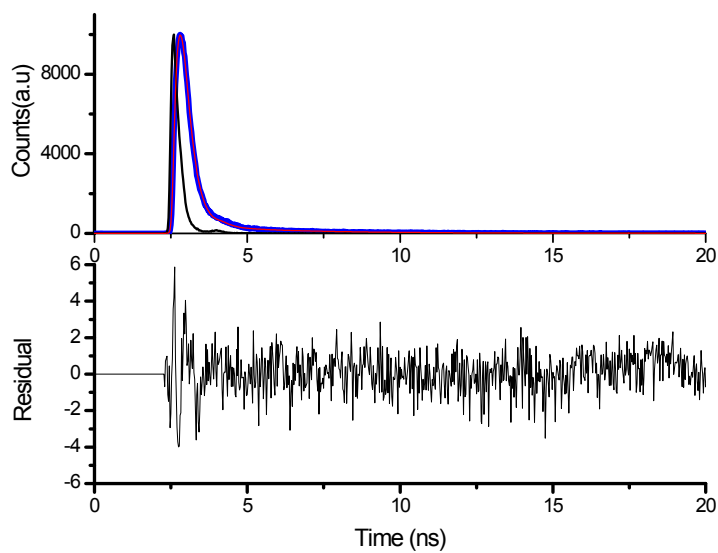

**Fig S7:** Fluorescence lifetime decay curve of complex **6** in DMSO

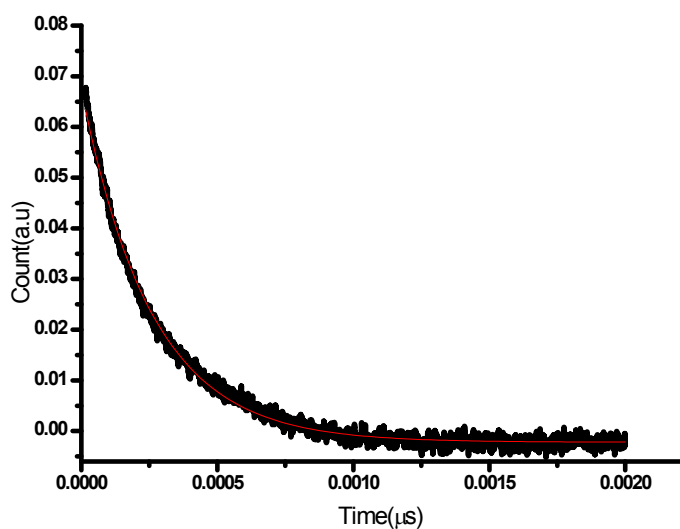

**Fig. S8:** Triplet decay curve of 6CB-AuNPs in DMSO

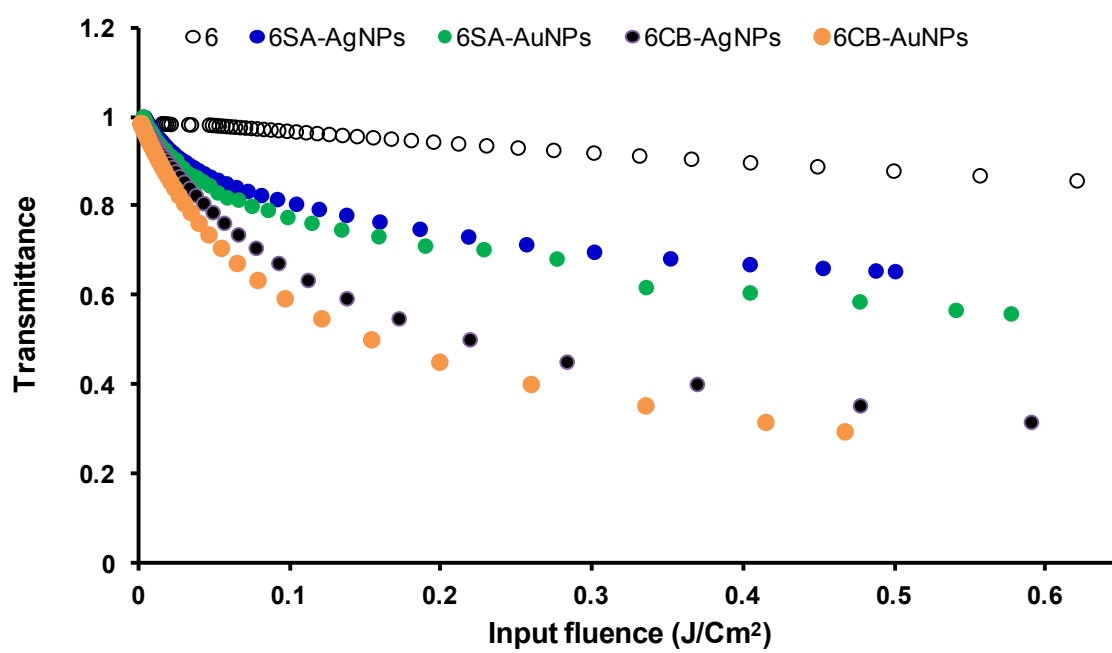

**Fig. S9:** Transmission vs. input fluence ( $I_0$ ) curve for complex **6** and its nanoconjugates



**Table S1.** TD-DFT spectra of the B3LYP optimized geometries for **6** with a four-fold symmetric set of attachments calculated with the CAM-B3LYP functional and 6-31G(d) basis sets.

| 6                 |                |                   |            |                  |     |                                                                                                                                                                   |  |  |  |
|-------------------|----------------|-------------------|------------|------------------|-----|-------------------------------------------------------------------------------------------------------------------------------------------------------------------|--|--|--|
| Band <sup>a</sup> | # <sup>b</sup> | Calc <sup>c</sup> |            | Exp <sup>d</sup> |     | Wave Function <sup>e</sup> =                                                                                                                                      |  |  |  |
| <b>Q</b>          | <b>1</b>       | 16.0              | 626 (0.49) | 14.7             | 680 | <b>93% 1a<sub>1u</sub> → 1e<sub>g</sub><sup>*</sup>; ...</b>                                                                                                      |  |  |  |
|                   | <b>2</b>       | 16.1              | 620 (0.72) |                  |     | <b>93% 1a<sub>1u</sub> → 1e<sub>g</sub><sup>*</sup>; ...</b>                                                                                                      |  |  |  |
| <b>B1</b>         | <b>12</b>      | 32.4              | 309 (0.70) | 28.7             | 348 | <b>41% 1a<sub>2u</sub> → 1e<sub>g</sub><sup>*</sup>; 11% H-3<sup>Ph</sup> → 1e<sub>g</sub><sup>*</sup>; ...</b>                                                   |  |  |  |
|                   | <b>13</b>      | 32.6              | 307 (1.13) |                  |     | <b>45% 1a<sub>2u</sub> → 1e<sub>g</sub><sup>*</sup>; 16% H-4<sup>Ph</sup> → 1e<sub>g</sub><sup>*</sup>; 11% 1b<sub>2u</sub> → 1e<sub>g</sub><sup>*</sup>; ...</b> |  |  |  |
| <b>B2</b>         | <b>18</b>      | 34.4              | 291 (0.38) | ---              | --- | 42% 2a <sub>2u</sub> → 1e <sub>g</sub> <sup>*</sup> ; ...                                                                                                         |  |  |  |
|                   | <b>19</b>      | 34.4              | 290 (0.43) |                  |     | 44% 2a <sub>2u</sub> → 1e <sub>g</sub> <sup>*</sup> ; ...                                                                                                         |  |  |  |

a – Band assignment described in the text. b – The number of the state assigned in terms of ascending energy within the TD-DFT calculation. c – Calculated band energies (10<sup>3</sup>.cm<sup>-1</sup>), wavelengths (nm) and oscillator strengths in parentheses (f). d – Observed energies (10<sup>3</sup>.cm<sup>-1</sup>) and wavelengths (nm) in Figure 1. e – The wave functions based on the eigenvectors predicted by TD-DFT with one-electron transitions associated with Gouterman's 4-orbital model highlighted in bold. The symmetry notations in each case used refer to the *D*<sub>4h</sub> symmetry of the parent monomeric Pc(-2) ligand to facilitate a comparison. Only one-electron transitions that provide a greater than 10% contribution are included and a Ph superscript is used to denote MOs that are localized primarily on the phenoxy substituents.
